# Supplementary material
Source: PubMed Central journal article supplement (PMC8120439)
Supplement: jamaophthalmol-e211275-s001.pdf [file jamaophthalmol-e211275-s001.pdf]

## Supplementary Online Content

You QS, Tsuboi K, Guo Y, et al. Comparison of central macular fluid volume with central subfield thickness in patients with diabetic macular edema using optical coherence tomography angiography. *JAMA Ophthalmol*. Published online May 13, 2021.  
doi:10.1001/jamaophthalmol.2021.1275

**eFigure 1.** Receiver Operating Characteristic Curves and Precision Recall Curves of Macular Fluid Volume for Diabetic Macular Edema

**eFigure 2.** Receiver Operating Characteristic Curves and Precision Recall Curves of Central Macular Fluid Volume and Central Subfield Thickness for Diabetic Macular Edema

**eFigure 3.** Central Macular Fluid Volume vs Central Macular Thickness

**eTable.** Diabetic Macular Edema by Manual Grading vs by Central Macular Fluid Volume or Central Subfield Thickness

This supplementary material has been provided by the authors to give readers additional information about their work.

**eFigure 1.** Receiver Operating Characteristic Curves and Precision Recall Curves of Macular Fluid Volume for Diabetic Macular Edema

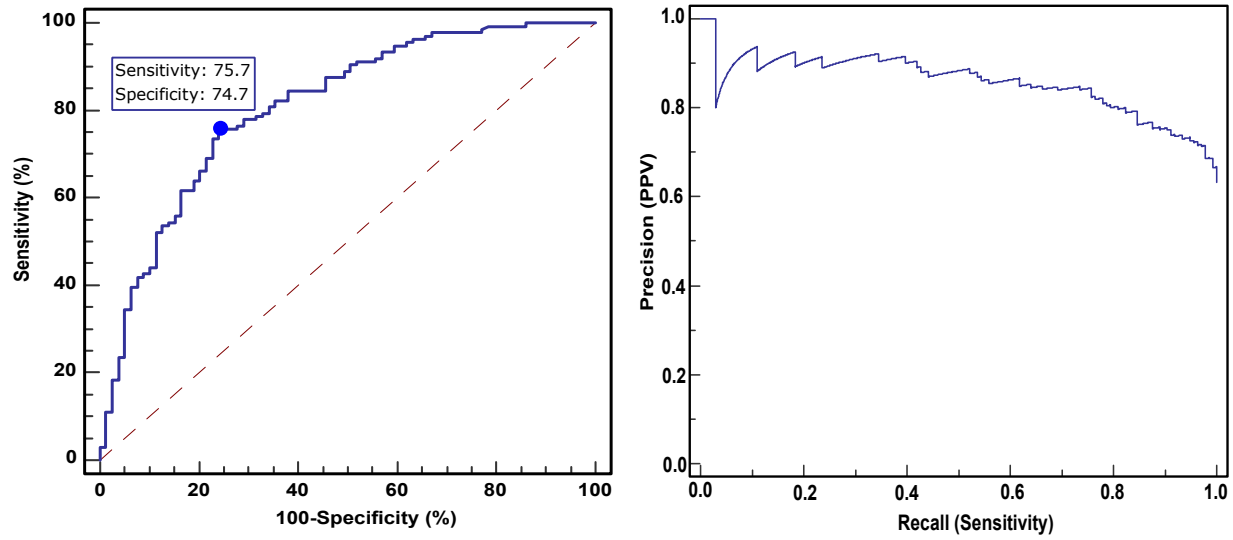

The blue dot on the curve shows the operating point closest to the left upper corner.

**eFigure 2.** Receiver Operating Characteristic Curves and Precision Recall Curves of Central Macular Fluid Volume and Central Subfield Thickness for Diabetic Macular Edema

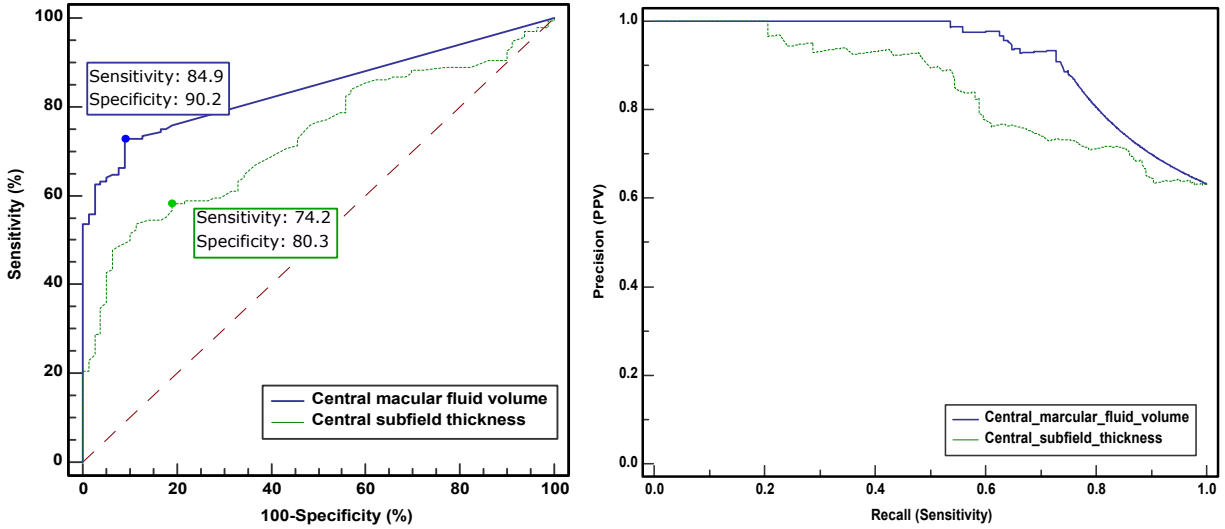

The dots on the curves show the operating points closest to the left upper corner.

**eFigure 3.** Central Macular Fluid Volume vs Central Macular Thickness

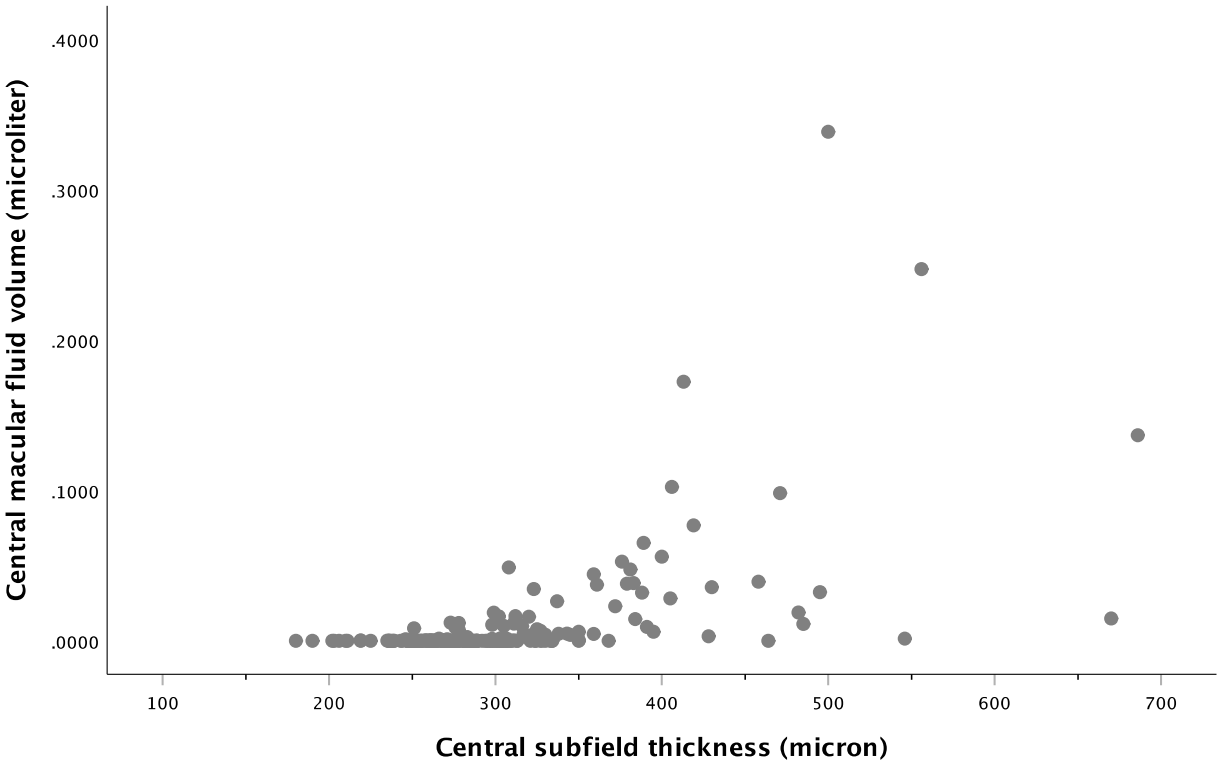

**eTable.** Diabetic Macular Edema by Manual Grading vs by Central Macular Fluid Volume or Central Subfield Thickness

|                                |   | DME by CMFV threshold |            | Total |
|--------------------------------|---|-----------------------|------------|-------|
|                                |   | 0                     | 1          |       |
| DME by manual grading<br>N (%) | 0 | 75 (94.9%)            | 4 (5.1%)   | 79    |
|                                | 1 | 49 (36.0%)            | 87 (64.0%) | 136   |
| Total                          |   | 124                   | 91         | 215   |
|                                |   |                       |            |       |
|                                |   | DME by CST threshold  |            | Total |
|                                |   | 0                     | 1          |       |
| DME by manual grading<br>N (%) | 0 | 75 (94.9%)            | 4 (5.1%)   | 79    |
|                                | 1 | 78 (57.4%)            | 58 (42.6%) | 136   |
| Total                          |   | 153                   | 62         | 215   |

DME: diabetic macular edema; CMFV: central macular fluid volume; CST: central subfield thickness
